# Supplementary material
Source: PubMed Central journal article supplement (PMC2949351)
Supplement: NIHMS233913-supplement-1_si_001.pdf [file NIHMS233913-supplement-1_si_001.pdf]

# **Supporting Information**

## **A Bacteriophage-Based Platform for Trace Detection of Proteases**

Petr Čapek, Killeen S. Kirkconnell, and Tobin J. Dickerson\*

*Department of Chemistry and Worm Institute of Research and Medicine (WIRM), The Scripps  
Research Institute, 10550 North Torrey Pines Road, La Jolla, CA 92037, USA.*

### **Table of Contents**

|                          |    |
|--------------------------|----|
| 1. Phagemid Construction | S2 |
| 2. Phage Preparation     | S2 |
| 3. Phage Attachment      | S2 |
| 4. Phage Cleavage        | S2 |
| 5. Phage Quantification  |    |
| Colony count titer       | S3 |
| qPCR                     | S3 |
| 6. References            | S3 |
| 7. Tables                |    |
| Table S1                 | S4 |
| 7. Figures               |    |
| Figure S1                | S5 |
| Figure S2                | S6 |
| Figure S3                | S7 |
| Figure S4                | S8 |
| Figure S5                | S9 |

### **1. Phagemid Construction**

DNA encoding the AGT reactive domain (amplified from pSNAP-tag®(T7) Vector, NEB N9174S), a BamHI restriction site, SNAP-25 (fragment corresponding to amino acids 141 – 206 of synaptosomal associated protein of 25kDa, amplified from Ultimate™ ORF Clone, Invitrogen, IOH9748), and a C-terminal glycine was assembled and inserted between *Sfi*I and *Ava* I restriction sites of pCGMT vector<sup>1</sup>. Phagemids coding for alternative substrates were constructed by substituting the SNAP-25 coding fragment with a Syb fragment (amino acids 33 – 94 of synaptobrevin 2, amplified from ATCC, MGC-45137) or a sequence coding for MAPKK (mitogen-activated protein kinase kinases) derived peptide (RRKKVYPYPMEATIA) using the *Bam*HI and *Ava* I restriction sites.

### **2. Phage Preparation**

The phagemids were transformed into *E. coli* XL1 blue. The cells were grown in 200 ml of 2 × YT media containing tetracycline and carbenicillin at 37 °C until the OD<sub>600</sub> reached 0.6. The culture was inoculated with 500 µl of 5 × 10<sup>12</sup> cfu/ml of helper phage (Stratagene, 200251) and incubated at 37 °C for 1 h while gently rocking. The infected cells were collected by centrifugation and resuspended in 200 ml of fresh 2 × YT with carbenicillin, kanamycin, and isopropyl β-D-thiogalactoside. The resuspended culture was grown at 30 °C overnight, spun down, and phage isolated from the supernatant by PEG precipitation (mixing supernatant with ¼ of the volume of 30% PEG 8000 and 15% NaCl). The phage was stored in PBS containing 1 mM DTT at –80 °C.

### **3. Phage Attachment**

The phages displaying the AGT reactive tag and toxin substrates were attached to SNAP-Capture magnetic beads (NEB, S9145S) according to the manufacturer's manual. A ratio of 10 µl of beads per 1 ml of phage solution at a concentration of 1 × 10<sup>12</sup> cfu/ml was used. The phage in 2 mM DTT and beads were mixed on a rotator at room temperature for 1 h. The beads were then washed to remove unbound and non-specifically bound phage. The beads were washed with 1 mM DTT in PBS, followed by two washes with 1 mM DTT and 0.5% Tween-20 in PBS. The beads were incubated at 55 °C for 20 min, after which the liquid was discarded. The beads were washed three more times with the same buffer, once with 1 mM DTT in PBS, and once with the appropriate cleavage buffer before being used in the cleavage reaction.

### **4. Phage Cleavage**

The beads were resuspended in the cleavage buffer and distributed into wells of a flat-bottom untreated 96-well plate (Corning, #3370). Dilutions of the toxin in cleavage buffer were added to the beads and incubated for 3 h at room temperature. After 3 h, a magnetic particle separator was used to separate the beads, and the supernatant was collected to quantify the phage.

## 5. Phage Quantification

### Colony count titer

The post-cleavage phage was initially diluted 1/10 into PBS, followed by 6 fold serial dilutions into PBS. *E. coli* XL1 blue grown to OD<sub>600</sub> ~0.6 in 2 × YT with tetracycline were added to the phage dilutions in a ratio of 1:1 and incubated with the phage for 45 min at 37 °C without agitation. The cells were then plated on agar plates containing tetracycline and carbenicillin to select for infected bacteria and incubated at 37 °C overnight, followed by colony counting to quantify the phage.

### qPCR

Platinum SYBR Green qPCR SuperMix-UDG kit (Intvirogen 11733038) was used with phage dilutions as the template according to the manufacturer's procedure. 5 µL of initial phage dilution into water (1:11) was added into each reaction (40 µL total volume). The cycling program went as follows: 95 °C for 2 min; 45 cycles of: 95 °C for 15 s, 55 °C for 30 s, 72 °C for 30 s.

The following primers were used:

#### *SNAP-25 phage quantification*

Forward primer: 5'- GAGCCCGAGAAAATGAAATG

Reverse primer: 5'-GCGATTCTGGGTGTCAATCT;

#### *Syb phage quantification*

Forward primer: 5'- ACATCATGAGGGTGAACGTG

Reverse primer: 5'- GTATTTGCGCTTGAGCTTGG;

#### *MAPKK phage quantification*

Forward primers: 5'- CGGTTATGAAGGTGGTCTGG

Reverse primer: 5'- GCTTCCATCGGATACGGATA.

Reaction Ct values, defined as the number of cycles it takes for the fluorescence to reach a defined threshold, were converted into phage concentrations using a calibration curve obtained from phage dilutions of known concentration.

## 6. References

- (1) Gao, C.; Lin, C. H.; Lo, C. H.; Mao, S.; Wirsching, P.; Lerner, R. A.; Janda, K. D. *Proc Natl Acad Sci U S A* **1997**, *94*, 11777.

| Days stored | Storage conditions | LOD [pM] |
|-------------|--------------------|----------|
| <b>0</b>    | + 4 °C             | 10       |
| <b>2</b>    | + 4 °C             | 12       |
| <b>7</b>    | + 4 °C             | 12       |
| <b>14</b>   | + 4 °C             | 7        |
| <b>14</b>   | - 80 °C            | 8        |

**Table S1.** Limits of detection (LODs) of BoNT/A light chain using SNAP25-phage pre-attached to magnetic beads. Cleavage reactions were carried out at 25 °C for 3 h in HZTD buffer (40 mM HEPES pH 7.4, 20  $\mu$ M ZnCl<sub>2</sub>, 0.1% Tween 20, 1 mM DTT). The phage was attached to the beads as described and stored at +4 °C or -80 °C in PBS with 1 mM DTT for given periods of time prior to use (“0” indicates that the phage was used immediately).

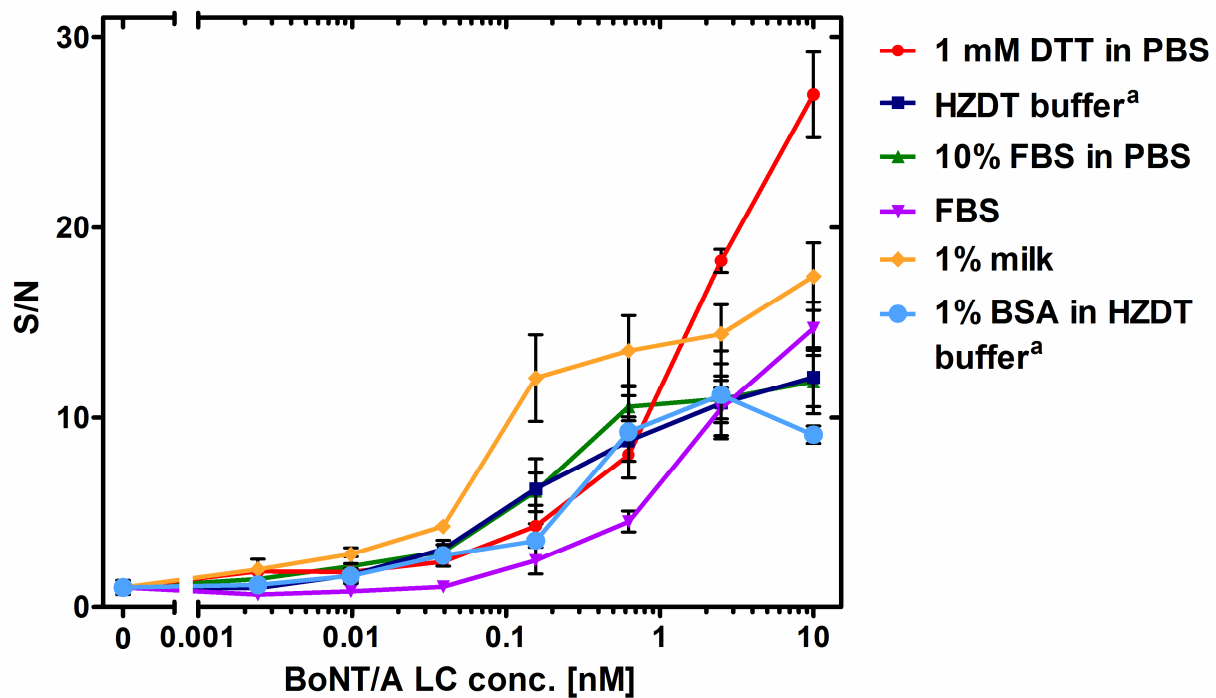

**Figure S1.** Relative signal intensities in different cleavage buffers and various BoNT/A light chain (LC) concentrations. (a) HZTD buffer: 40 mM HEPES pH 7.4, 20  $\mu$ M ZnCl<sub>2</sub>, 0.1% Tween 20, 1 mM DTT.

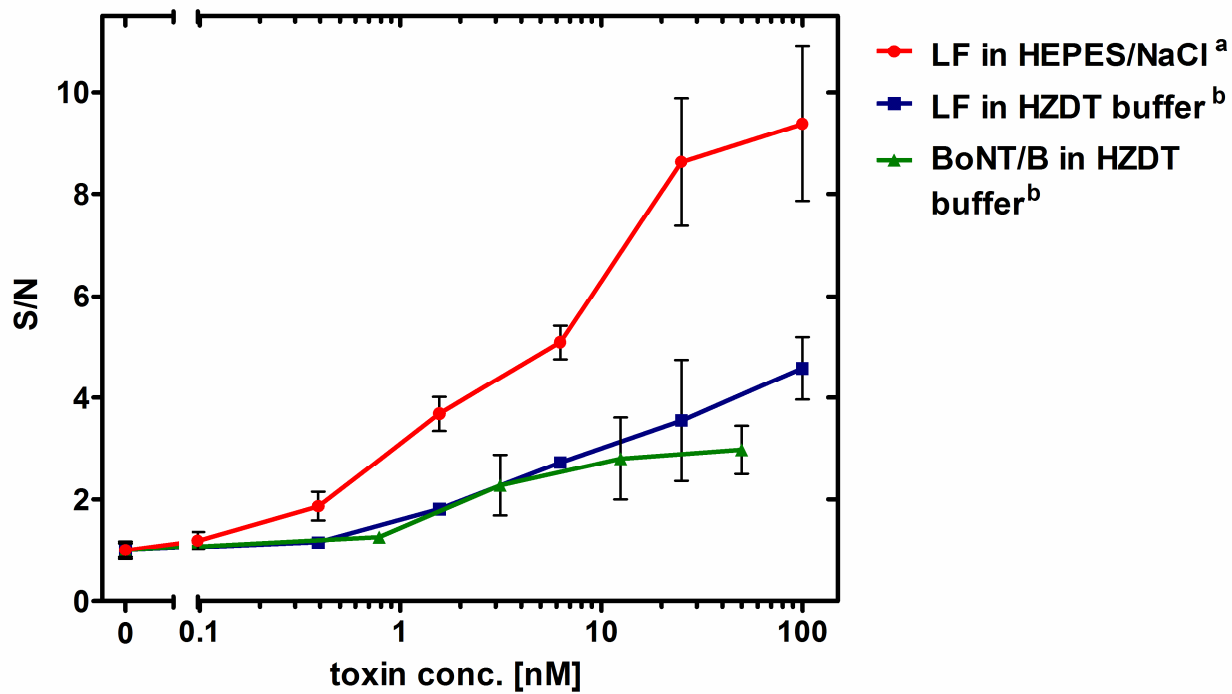

**Figure S2.** Relative intensities of assay response for MAKKP phage treated with LF and Syb phage treated with BoNT/B. (a) 40 mM HEPES pH 7.4 with 100 mM NaCl; (b) HZTD buffer: 40 mM HEPES pH 7.4, 20  $\mu$ M ZnCl<sub>2</sub>, 0.1% Tween 20, 1 mM DTT.

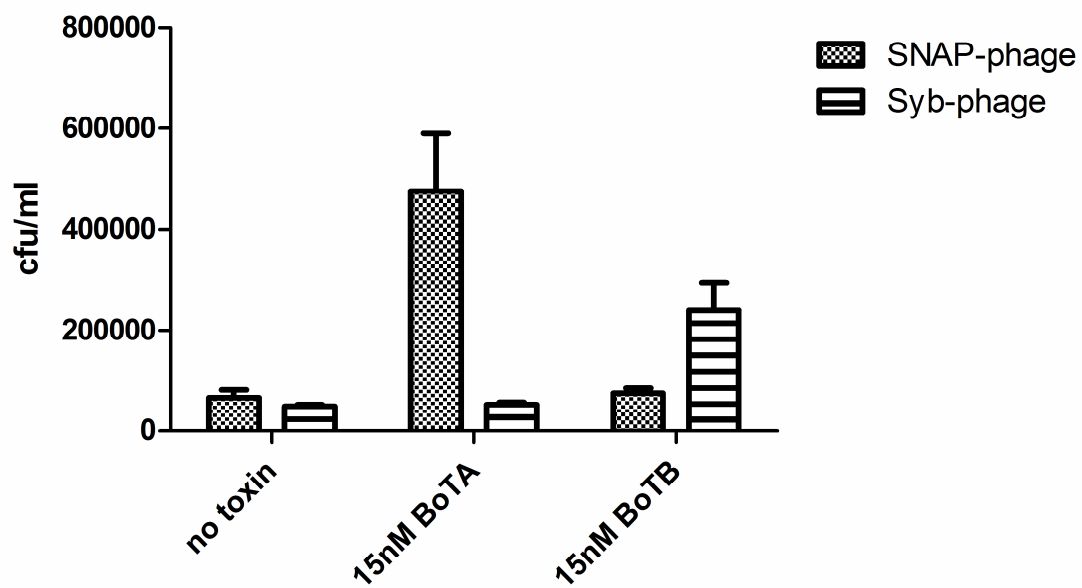

**Figure S3.** SNAP-phage and Syb-phage were treated in separate reactions with either BoNT/A or /B. Signals from substrates treated with non-native toxin are not different from those of untreated substrates.

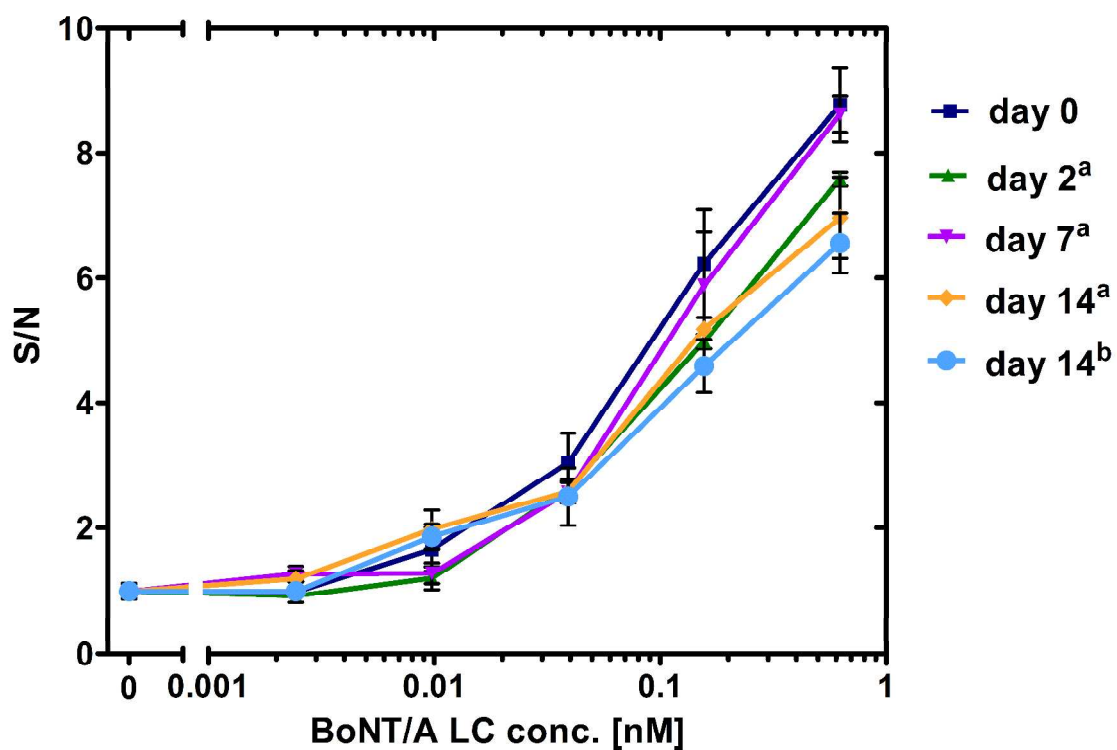

**Figure S4.** Relative signal intensities of assay performed with BoNT/A light chain and SNAP25-phage pre-attached to magnetic beads. Cleavage reactions were carried out at 25 °C for 3h in HZTD buffer (40 mM HEPES pH 7.4, 20  $\mu$ M ZnCl<sub>2</sub>, 0.1% Tween 20, 1 mM DTT). The phage was attached to the beads as described and stored at (a) +4 °C or (b) -80 °C in PBS with 1 mM DTT for given periods of time prior to use (“day 0” indicates that the phage was used immediately).



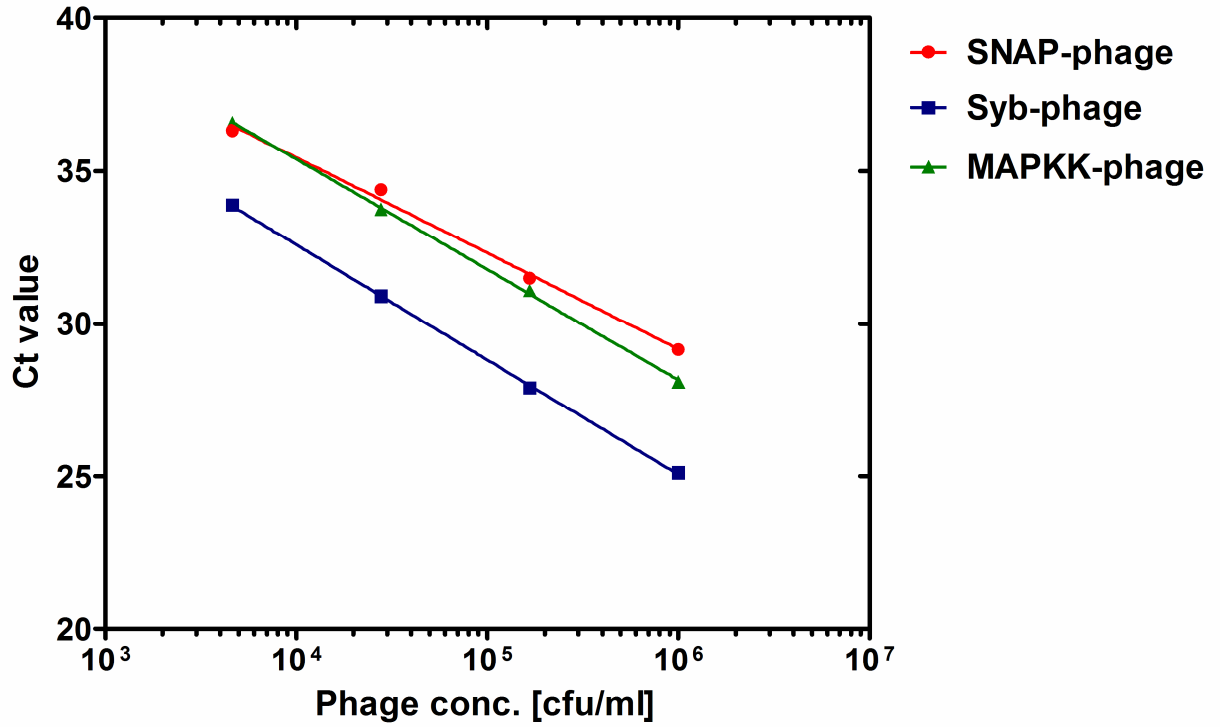

**Figure S5.** qPCR calibration curves for three substrate phages. Ct value corresponds to the cycle number when the fluorescence crosses the fluorescence threshold.
